# Supplementary material
Source: PubMed Central journal article supplement (PMC9492646)
Supplement: NIHMS1824348-supplement-1.pdf [file NIHMS1824348-supplement-1.pdf]

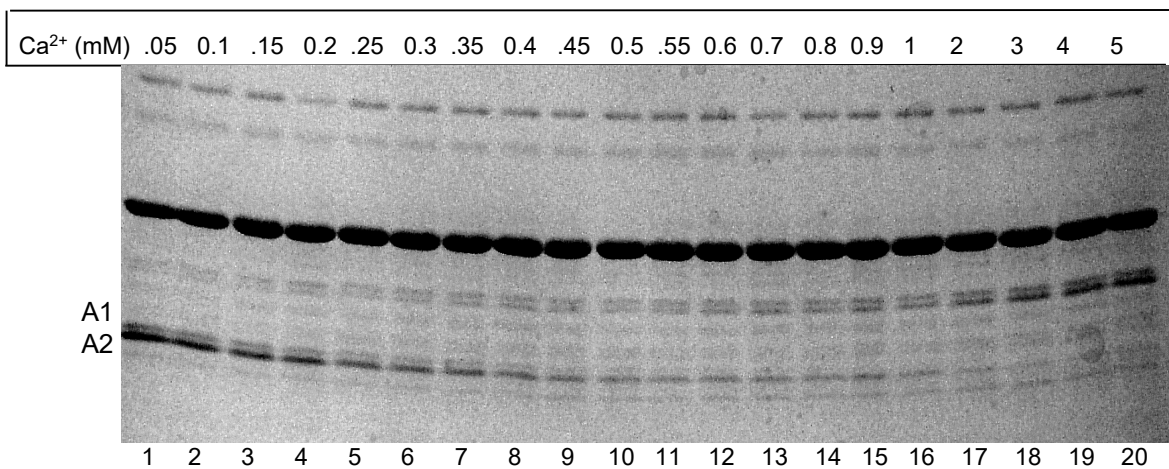

**Supplemental Fig. 1.** Titration experiment to determine the concentration of Ca<sup>2+</sup> needed to protect WT CRP from protease cleavage. Reducing SDS-PAGE of WT CRP treated with protease in the presence of 0.05-5 mM Ca<sup>2+</sup> was run on a 4-20% polyacrylamide gradient gel. Bands were visualized by Coomassie brilliant blue staining.
